# Supplementary material for: Increased Galectin-9 Levels Correlate with Disease Activity in Patients with DMARD-Naïve Rheumatoid Arthritis and Modulate the Secretion of MCP-1 and IL-6 from Synovial Fibroblasts
Source: MDPI journal article supplement (doi:10.3390/cells12020327), 2023-01-15
Supplement: s1 [file s1]

Supplementary Figure S1

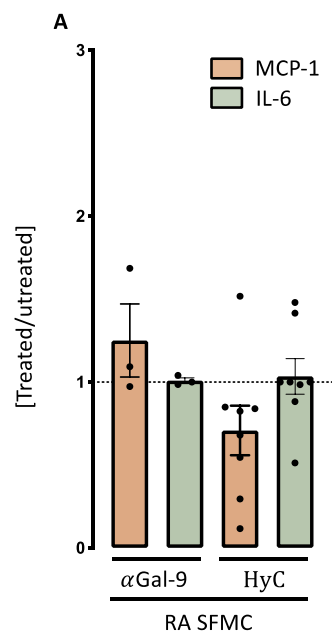

Secretion of MCP-1 and IL-6 from SFMC cultures. Results are expressed as ratios of the cytokine concentrations in neutralizing Gal-9, (Gal-Nab2, 10 µg/ml) (n = 3) and Hydrocortisone (HC) (1 µg/ml) (n = 8) treated cultures divided by the concentration in control cultures, cultured for 48 hours. Untreated RA SFMC cultures produced averagely  $257.7 \pm 174.5$  pg/ml MCP-1 and  $43.23 \pm 9.2$  pg/ml IL-6 (Mean  $\pm$  SEM). Bars indicate mean  $\pm$  SEM.

Supplementary Figure S2

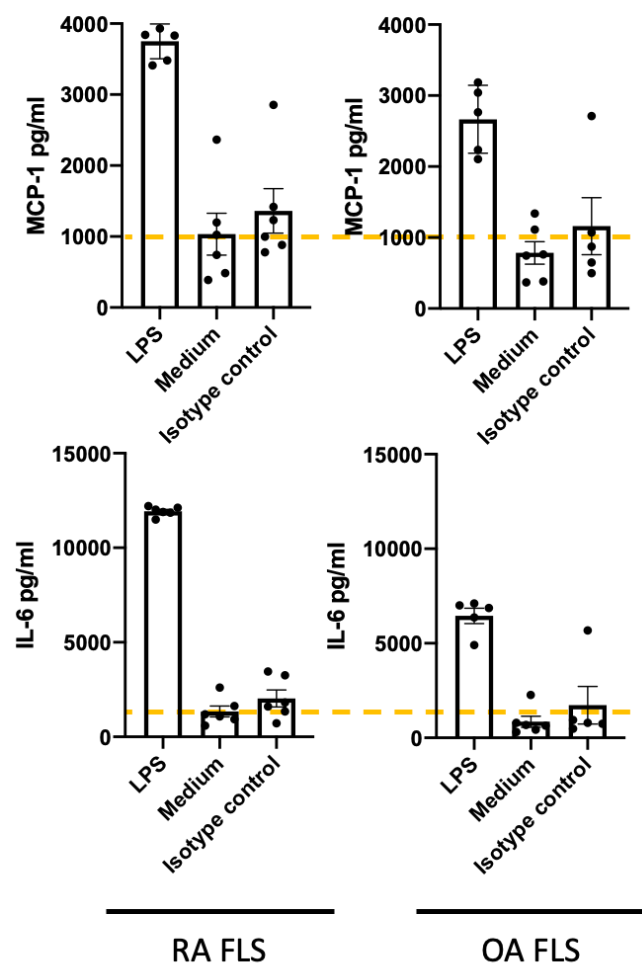

Secretion of MCP-1 and IL-6 from 48 h RA and OA FLS cultures. Bars indicate mean  $\pm$  SEM. Untreated monocultures of RA FLS (Yellow dotted line) produced averagely  $1034 \pm 295$  pg/ml MCP-1 and  $1341 \pm 289$  pg/ml IL-6 and OA FLS produced  $784 \pm 158$  pg/ml MCP-1 and  $854 \pm 293$  pg/ml IL-6 (Mean  $\pm$  SEM).
